# Supplementary material
Source: PubMed Central journal article supplement (PMC3632304)

# Supplemental Figure 1

A

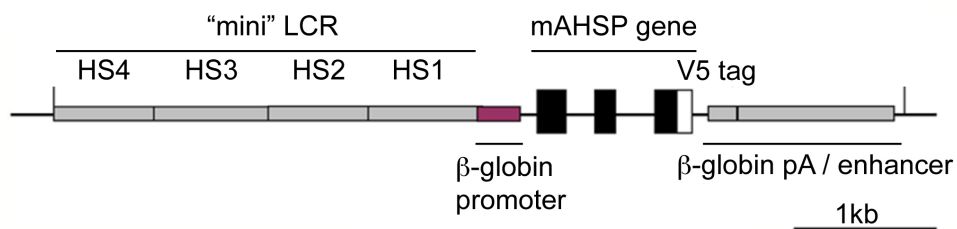

B

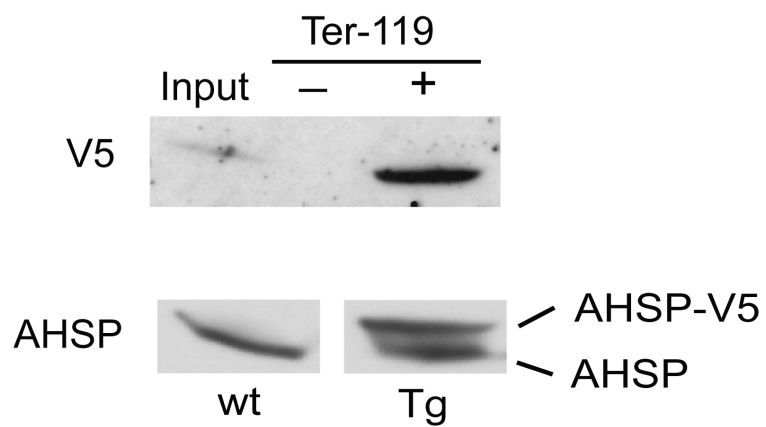

C

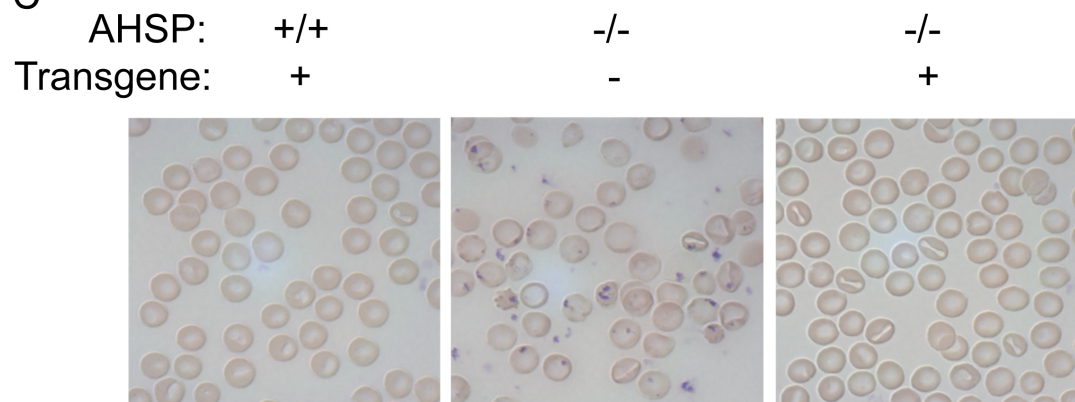

Supplement: NIHMS452826-supplement-S1.pdf [file NIHMS452826-supplement-S1.pdf]

Supplemental Figure 2

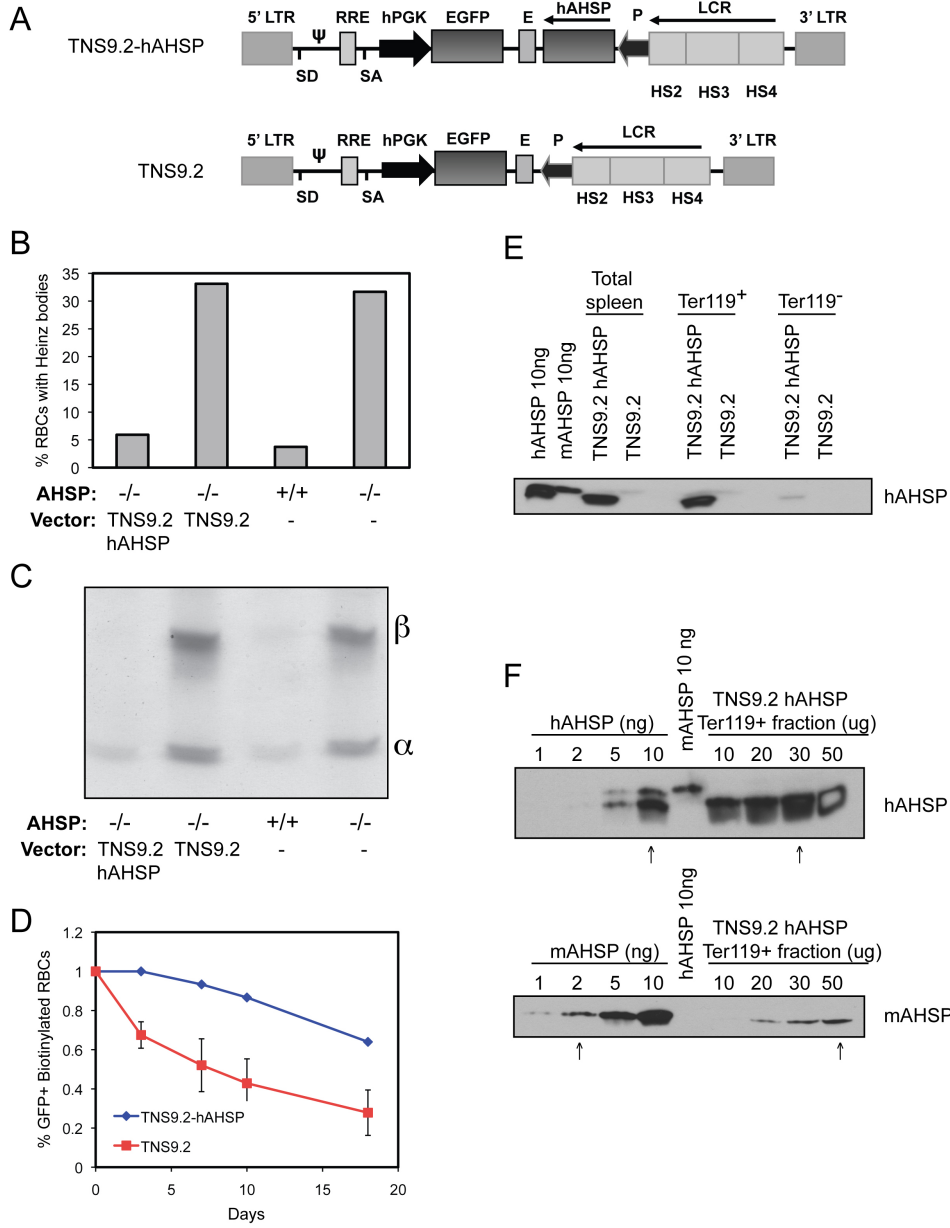

Supplement: NIHMS452826-supplement-S2.pdf [file NIHMS452826-supplement-S2.pdf]

# Supplemental Figure 3

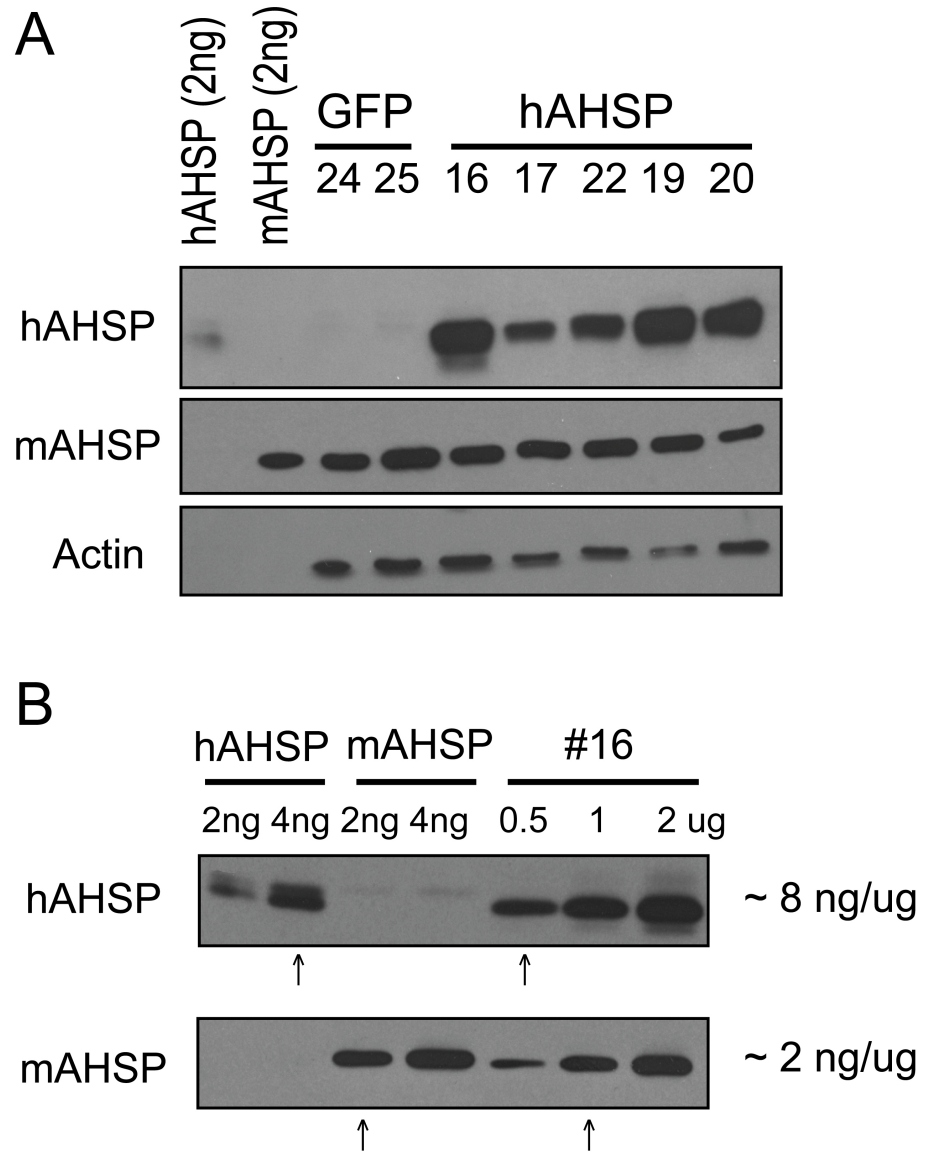

Supplement: NIHMS452826-supplement-S3.pdf [file NIHMS452826-supplement-S3.pdf]
